# Supplementary material for: Sorption of tetracycline on biochar derived from rice straw and swine manure
Source: Royal Society of Chemistry journal article supplement (doi:10.1039/c8ra01454j), 2018-01-01
Supplement: c8ra01454j1.pdf [file c8ra01454j1.pdf]

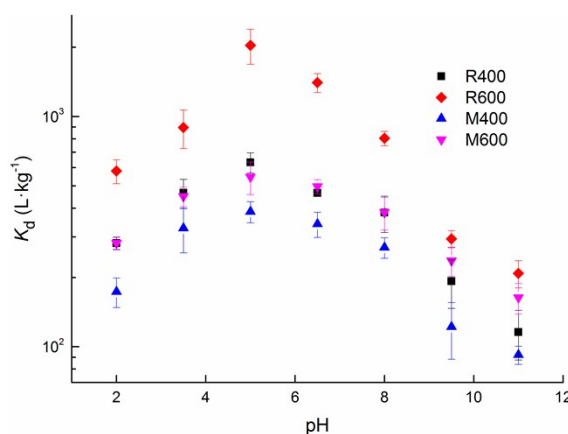

**Fig. S1** Effect of pH on adsorption coefficients ( $K_d$ ) for tetracycline sorption on biochars. Error bars indicate the SD.

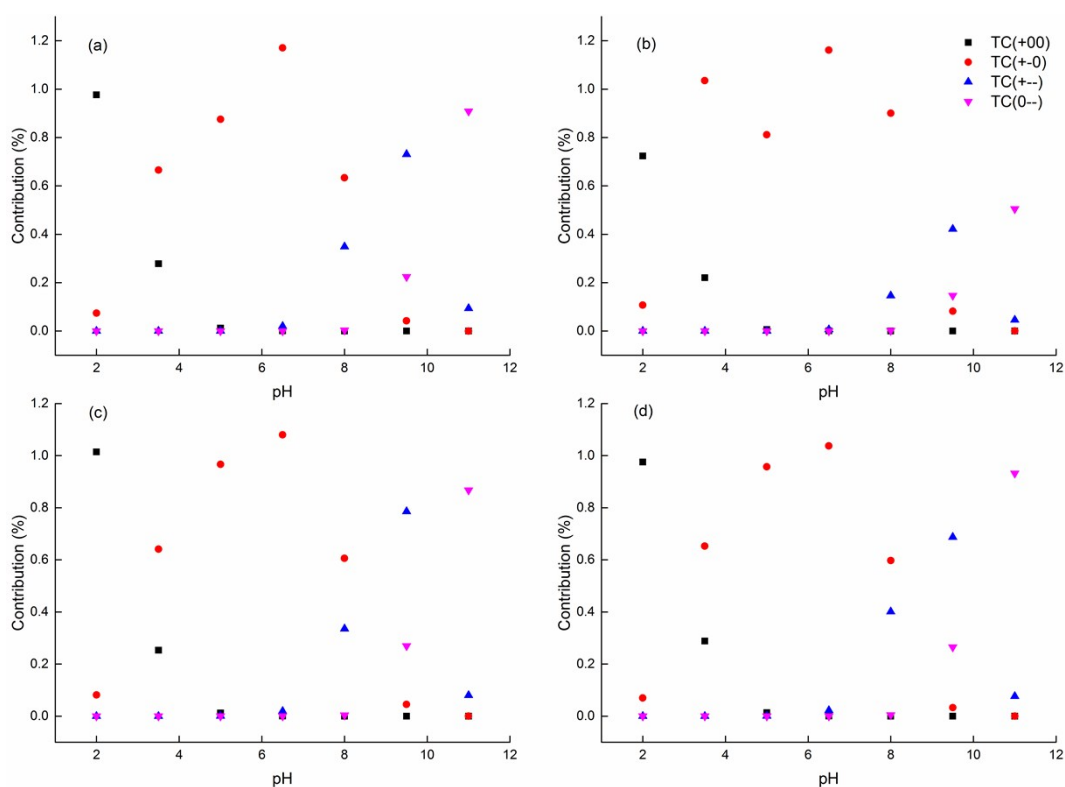

**Fig. S2** The contribution of four TC species to the adsorption process on biochar. (a) R400, (b) R600, (c) M400 and (d) M600.

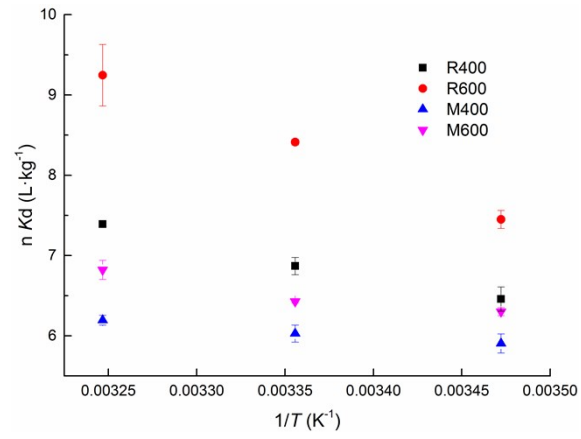

**Fig. S3** Effect of temperature on sorption coefficient ( $K_d$ ) for tetracycline sorption on biochars. The initial concentration of tetracycline was  $16 \text{ mg}\cdot\text{L}^{-1}$ .
